# Supplementary material for: Teaching home-visitors to support responsive caregiving: A cluster randomized controlled trial of an online professional development program in Brazil
Source: PubMed Central journal article supplement (PMC8818297; doi:10.7189/jogh.12.04007), 2022-02-05
Supplement: jogh-12-04007-s001.pdf [file jogh-12-04007-s001.pdf]

Promoting Responsive Caregiving in Brazil: A Cluster Randomized Controlled Trial of an  
Online Professional Development Course for Home-Visitors

Supplemental Materials

## Interview Guide

### Q1. WHY IS RESPONSIVITY IMPORTANT

**Tell me about why you think it's important to promote good parenting interactions.**

Expected response #1: Good interactions help support children's socio-emotional development (i.e., mental health/confidence/attachment security).

*Probe: How do you think it might make a difference to how children behave?*

Expected response #2: Good interactions help to promote children's language and cognitive development

*Probe: How do you think it might make a difference to children's learning?*

### Q2. IDENTIFYING (UN)RESPONSIVE BEHAVIORS

**Video 1, Part 1. Tell me a little bit about what you noticed about how the mother and child interacted together. Please tell me briefly what this mother did very well.**

Expected response #1: The mother demonstrated an awareness of and sensitivity toward the child's mood (happy) AND interests (toys)

*Probe: Did you get the sense that the mother understood the child's thoughts?*

Expected response #2: The mother did a good job following the child's interest (cooking toys) and not being too directive or taking over the interaction

*Probe: What did the mother do to keep the child engaged?*

Expected response #3: The mother used diverse language and questions which can help support child's vocabulary growth and learning.

*Probe: Can you comment on the language the mother was using?*

**Video 1, Part 2. Next, can you tell me about what the mother could have done differently to have an even better interaction?**

Expected response #4: The mother talked too much and should have done more watching/waiting to support a better back-and-forth interaction.

*Probe: Is there anything the mother could have done differently to be more responsive to the child's mood, wants, or interests?*

Expected response #5: The mother didn't work in the child's zone of proximal development (i.e., "learning zone") or add on to the interaction in a way that would create opportunities for the child to practice/learn language or motor skills.

*Probe: Is there anything the mother could have done differently to better support the child's learning and development?*

**Video 2, Part 1. Tell me a little bit about what you noticed about how the mother and child interacted together. Please tell me briefly what this mother did very well.**

Expected response #6: The mother used diverse language and questions which can help support child's vocabulary growth and learning.

*Probe: Can you comment on the language the mother was using?*

**Video 2, Part 2. Next, can you tell me about what the mother could have done differently to have an even better interaction?**

Expected response #7: The mother was not following the child's lead and just doing what she thought would be interesting with the toys (playing by herself) and telling the child what to do

*Probe: Is there anything the mother could have done differently to be more responsive to the child's mood, wants, or interests?*

Expected response #8: The mother talked too much and should have done more watching/waiting to support a better back-and-forth interaction.

*Probe: How else could she have been more responsive to the child?*

Expected response #9: The mother didn't work in the child's zone of proximal development (i.e., "learning zone") or add on to the interaction in a way that would create opportunities for the child to practice/learn language or motor skills.

*Probe: Is there anything the mother could have done differently to better support the child's learning and development?*

Expected response #10: The mother could have been more sensitive/responsive to the child and his perspective (i.e., wants/interests/ability levels).

*Probe: What would you have done to improve the quality of the interaction?*

### **Q3. HOW TO COACH RESPONSIVITY**

**Can you pick one of the things that you would change from the previous question and tell me, in the role of a home visitor, what you would do or say to help this mother make this change?**

Expected response #1: Either praise the mother or broadcast the mother's actions, with detail about how/when to use this strategy and/or why it works.

*Probe: What might you, as a home visitor, do or say to help the mother realize what she was doing well?*

Expected response #2: Either model a responsive behavior for the mother or broadcast the child's perspective, with detail about how/when to use this strategy and/or why it works.

*Probe: What might you, as a home visitor, do or say to help the mother realize what she was not doing as well?*

Expected response #3: Names several effective coaching strategies (e.g., praise, model, broadcast parent actions, broadcast child perspective).

*Probe: What strategies would you use to coach the mother?*

#### **Q4. HOW TO PROMOTE AND MONITOR PARENT PROGRESS**

**You have just told me what you would help the mother to change her behavior. Now can you tell me, how would you ensure this change is occurring?**

Expected response #1: Work with the mother to set a clear and explicit goal at the end of each visit.

*Probe: How would you help the mother know what to work on?*

Expected response #2: Encourage the mother to make a system to keep track of her own practice/progress on the goal (e.g., check marks on a calendar indicating days she worked on the goal).

*Probe: How would you encourage the mother to practice?*

Expected response #3: Start the next visit by asking about how practice of the goal set during the previous visit went.

*Probe: How would you know whether the mother is using your suggestions?*

Table S12022-02-04 7:05:00 PM

*Course Satisfaction rated on 5-point Likert scales*

| <b>Satisfaction with Course Components</b>                                                                                                                     | Mean (SD)  |
|----------------------------------------------------------------------------------------------------------------------------------------------------------------|------------|
| Online lectures                                                                                                                                                | 4.58 (.50) |
| Video examples                                                                                                                                                 | 4.60 (.49) |
| Pauses to write and reflect                                                                                                                                    | 4.42 (.60) |
| Online quizzes                                                                                                                                                 | 4.47 (.62) |
| Online assignments                                                                                                                                             | 4.56 (.62) |
| Discussions during synchronous sessions                                                                                                                        | 4.59 (.61) |
| Activities during synchronous sessions                                                                                                                         | 4.47 (.69) |
| <b>Satisfaction with Overall Course</b>                                                                                                                        |            |
| It was helpful to my learning to take the course in a team with my colleagues.                                                                                 | 4.79 (.41) |
| What I learned in this course is new or different from what I already knew.                                                                                    | 3.88 (.96) |
| What I learnt in this course is relevant to me and my work as a supervisor/home-visitor.                                                                       | 4.57 (.75) |
| What I learnt in this course is compatible with the Crianca Feliz program.                                                                                     | 4.66 (.64) |
| I am confident that I understand what makes for a responsive interaction for learning.                                                                         | 4.59 (.49) |
| I am confident that I will be able to use what I have learnt to support families to have more responsive interactions for learning.                            | 4.75 (.44) |
| After having participated in this course, I have changed / will change how I interact with children in my personal life (as a parent, aunt, grandparent, ...). | 4.47 (.74) |
| Having participated in this course has made me / will make me better able to support families and child development.                                           | 4.66 (.67) |
| I have shared / plan to share what I have learnt with other supervisors/home-visitors.                                                                         | 4.48 (.66) |
| I would recommend this course to other supervisors/home-visitors.                                                                                              | 4.78 (.42) |
| I am satisfied with my experience in the course.                                                                                                               | 4.69 (.46) |

Table S2

*Correlations between outcomes and course attendance/performance in the intervention group*

|                                           | % of Quizzes Completed | Average Accuracy on Quizzes | % of Assignments Completed | Attendance at Synchronous Sessions |
|-------------------------------------------|------------------------|-----------------------------|----------------------------|------------------------------------|
| Socioemotional benefits of responsiveness | -0.07 (0.57)           | 0.02 (0.84)                 | -0.05 (0.66)               | 0.17 (0.14)                        |
| Cognitive benefits of responsiveness      | 0.08 (0.50)            | 0.15 (0.22)                 | 0.04 (0.73)                | 0.02 (0.88)                        |
| Identifying (un)responsive behaviors      | -0.02 (0.86)           | 0.12 (0.28)                 | 0.02 (0.83)                | 0.09 (0.40)                        |
| Coaching responsiveness                   | -0.04 (0.71)           | 0.17 (0.12)                 | 0.10 (0.36)                | -0.08 (0.46)                       |
| Setting goals                             | -0.15 (0.20)           | 0.13 (0.29)                 | -0.07 (0.57)               | 0.05 (0.69)                        |
| Tracking goal implementation              | -0.09 (0.47)           | 0.29 (0.02)*                | 0.09 (0.45)                | 0.23 (0.04)*                       |
| Monitoring progress                       | -0.14 (0.23)           | 0.20 (0.09)                 | -0.07 (0.57)               | -0.01 (0.94)                       |
| Following children's lead                 | 0.21 (0.04)*           | 0.05 (0.66)                 | 0.15 (0.17)                | 0.18 (0.08)                        |
| Perspective-Taking                        | -0.09 (0.42)           | 0.20 (0.08)                 | 0.07 (0.49)                | -0.06 (0.59)                       |

Values represent Pearson correlations ( $r$ ) followed by two-tailed  $p$ -values in parentheses.

Table S3

*Moderation of the intervention effects*

|                                               | Supervisor vs.<br>Home-visitor | Age<br>(<30 years<br>vs. 30+<br>years) | Education<br>(<university<br>degree vs.<br>university<br>degree +) | Experience<br>working<br>with kids<br>(<3 years vs.<br>3+ years) | Pre-<br>Intervention<br>Perspective-<br>Taking |
|-----------------------------------------------|--------------------------------|----------------------------------------|--------------------------------------------------------------------|------------------------------------------------------------------|------------------------------------------------|
| Socioemotional<br>benefits of<br>responsivity | -0.28 (0.29)                   | 0.28 (0.30)                            | 0.02 (0.94)                                                        | -0.26 (0.32)                                                     | -0.01 (0.94)                                   |
| Cognitive benefits<br>of responsivity         | -0.04 (0.87)                   | 0.29 (0.23)                            | 0.27 (0.21)                                                        | 0.26 (0.27)                                                      | 0.13 (0.52)                                    |
| Identifying<br>(un)responsive<br>behaviors    | -0.05 (0.58)                   | 0.10 (0.25)                            | 0.14 (0.08)                                                        | -0.07 (0.49)                                                     | -0.02 (0.78)                                   |
| Coaching<br>responsivity                      | 0.001 (0.99)                   | 0.05 (0.77)                            | 0.22 (0.18)                                                        | -0.28 (0.13)                                                     | 0.06 (0.68)                                    |
| Setting goals                                 | -0.24 (0.37)                   | 0.15 (0.60)                            | -0.12 (0.66)                                                       | -0.18 (0.53)                                                     | 0.09 (0.68)                                    |
| Tracking goal<br>implementation               | -0.007 (0.98)                  | 0.37 (0.09)                            | 0.25 (0.23)                                                        | 0.28 (0.24)                                                      | 0.29 (0.10)                                    |
| Monitoring<br>progress                        | -0.07 (0.76)                   | -0.18 (0.38)                           | 0.09 (0.64)                                                        | 0.10 (0.67)                                                      | 0.14 (0.39)                                    |
| Following<br>children's lead                  | 0.10 (0.70)                    | -0.08 (0.75)                           | 0.17 (0.46)                                                        | -0.13 (0.64)                                                     | 0.06 (0.76)                                    |
| Perspective-Taking                            | 0.06 (0.74)                    | 0.0006<br>(0.99)                       | 0.11 (0.53)                                                        | -0.20 (0.34)                                                     | N/A                                            |

Values represent regression coefficients (b) for interaction terms followed by two-tailed *p*-values in parentheses.
